# Supplementary material
Source: PubMed Central journal article supplement (PMC2832245)
Supplement: pp.109.151795_1.pdf [file pp.109.151795_1.pdf]

|               |      |                  |                       |                       |                         |
|---------------|------|------------------|-----------------------|-----------------------|-------------------------|
| Methionine    | 1    | 0,058 ± 0,001    | 0,052 ± 0,014         | 0,044 ± 0,016         | <b>0,035 ± 0,008</b>    |
|               | 4    | 0,118 ± 0,013    | 0,107 ± 0,024         | <b>0,054 ± 0,019</b>  | <b>0,058 ± 0,014</b>    |
|               | 7,5  | 0,102 ± 0,004    | 0,100 ± 0,023         | 0,071 ± 0,017         | 0,072 ± 0,025           |
|               | 9    | 0,079 ± 0,003    | 0,081 ± 0,020         | <b>0,010 ± 0,003</b>  | 0,046 ± 0,015           |
|               | 12   | 0,032 ± 0,008    | 0,041 ± 0,011         | 0,043 ± 0,012         | 0,048 ± 0,014           |
|               | 16   | 0,041 ± 0,005    | 0,036 ± 0,009         | 0,036 ± 0,010         | 0,027 ± 0,010           |
|               | 23,5 | 0,027 ± 0,008    | 0,025 ± 0,008         | 0,023 ± 0,007         | 0,027 ± 0,008           |
| Phenylalanine | 1    | 0,792 ± 0,044    | 0,913 ± 0,225         | 0,691 ± 0,159         | 0,532 ± 0,125           |
|               | 4    | 0,960 ± 0,055    | 1,316 ± 0,298         | 0,880 ± 0,201         | 0,745 ± 0,172           |
|               | 7,5  | 0,655 ± 0,036    | 0,916 ± 0,230         | 0,896 ± 0,212         | 1,218 ± 0,275           |
|               | 9    | 0,637 ± 0,022    | 1,080 ± 0,242         | 0,977 ± 0,219         | 0,768 ± 0,178           |
|               | 12   | 0,487 ± 0,048    | 0,714 ± 0,160         | 0,763 ± 0,181         | 0,703 ± 0,159           |
|               | 16   | 0,729 ± 0,028    | 0,739 ± 0,166         | 0,871 ± 0,200         | 0,773 ± 0,179           |
|               | 23,5 | 0,581 ± 0,019    | 0,596 ± 0,141         | 0,549 ± 0,129         | 0,551 ± 0,124           |
| Pyruvate      | 1    | 0,232 ± 0,009    | <b>0,610 ± 0,137</b>  | <b>0,663 ± 0,149</b>  | <b>0,569 ± 0,133</b>    |
|               | 4    | 0,254 ± 0,014    | <b>0,757 ± 0,170</b>  | <b>0,616 ± 0,139</b>  | <b>0,825 ± 0,187</b>    |
|               | 7,5  | 0,294 ± 0,006    | 0,444 ± 0,116         | 0,551 ± 0,130         | <b>0,909 ± 0,204</b>    |
|               | 9    | 0,160 ± 0,002    | 0,247 ± 0,056         | <b>0,409 ± 0,092</b>  | <b>0,384 ± 0,086</b>    |
|               | 12   | 0,192 ± 0,049    | 0,150 ± 0,035         | 0,259 ± 0,059         | 0,234 ± 0,053           |
|               | 16   | 0,086 ± 0,003    | 0,131 ± 0,030         | <b>0,206 ± 0,047</b>  | 0,177 ± 0,041           |
|               | 23,5 | 0,069 ± 0,009    | 0,136 ± 0,036         | 0,127 ± 0,029         | 0,153 ± 0,034           |
| Serine        | 1    | 3,847 ± 0,352    | <b>10,353 ± 2,317</b> | <b>9,721 ± 2,187</b>  | <b>8,231 ± 2,136</b>    |
|               | 4    | 7,122 ± 0,690    | <b>19,614 ± 4,409</b> | <b>18,494 ± 4,160</b> | <b>20,556 ± 4,625</b>   |
|               | 7,5  | 7,009 ± 0,512    | 12,675 ± 3,204        | <b>23,633 ± 5,481</b> | <b>31,279 ± 7,042</b>   |
|               | 9    | 8,148 ± 0,260    | 16,836 ± 3,811        | <b>32,732 ± 7,333</b> | <b>26,117 ± 6,119</b>   |
|               | 12   | 3,801 ± 0,150    | <b>9,970 ± 2,255</b>  | <b>23,480 ± 5,291</b> | <b>22,228 ± 5,020</b>   |
|               | 16   | 3,720 ± 0,046    | <b>9,521 ± 2,138</b>  | <b>14,019 ± 3,159</b> | <b>14,762 ± 3,325</b>   |
|               | 23,5 | 3,660 ± 0,110    | 7,919 ± 1,813         | 6,924 ± 1,585         | <b>8,436 ± 1,891</b>    |
| Shikimate     | 1    | 0,472 ± 0,021    | 0,468 ± 0,106         | 0,551 ± 0,124         | 0,516 ± 0,121           |
|               | 4    | 0,659 ± 0,029    | 0,794 ± 0,178         | 0,721 ± 0,162         | 0,657 ± 0,150           |
|               | 7,5  | 0,725 ± 0,020    | 0,744 ± 0,175         | 0,671 ± 0,153         | 1,048 ± 0,235           |
|               | 9    | 0,764 ± 0,009    | 0,908 ± 0,203         | 0,821 ± 0,184         | 0,833 ± 0,189           |
|               | 12   | 0,606 ± 0,019    | 0,585 ± 0,131         | 0,688 ± 0,159         | 0,609 ± 0,139           |
|               | 16   | 0,494 ± 0,011    | 0,459 ± 0,103         | 0,596 ± 0,135         | 0,433 ± 0,157           |
|               | 23,5 | 0,370 ± 0,013    | 0,398 ± 0,089         | 0,419 ± 0,096         | 0,415 ± 0,093           |
| Succinate     | 1    | 0,434 ± 0,052    | 0,448 ± 0,101         | 0,713 ± 0,161         | 0,473 ± 0,107           |
|               | 4    | 0,554 ± 0,029    | 0,802 ± 0,185         | 0,883 ± 0,200         | 0,779 ± 0,176           |
|               | 7,5  | 0,336 ± 0,023    | 0,598 ± 0,152         | 0,793 ± 0,188         | <b>1,240 ± 0,278</b>    |
|               | 9    | 0,528 ± 0,023    | 0,920 ± 0,211         | <b>1,481 ± 0,339</b>  | 1,076 ± 0,263           |
|               | 12   | 0,544 ± 0,007    | 0,626 ± 0,142         | 0,719 ± 0,168         | 0,693 ± 0,157           |
|               | 16   | 0,525 ± 0,015    | 0,602 ± 0,137         | 0,630 ± 0,146         | 0,535 ± 0,121           |
|               | 23,5 | 0,458 ± 0,028    | 0,474 ± 0,107         | 0,338 ± 0,078         | 0,373 ± 0,084           |
| Sucrose       | 1    | 135,051 ± 6,078  | 142,523 ± 32,815      | 164,101 ± 36,739      | 105,884 ± 24,545        |
|               | 4    | 214,510 ± 11,536 | 183,517 ± 41,059      | 163,926 ± 36,682      | <b>122,095 ± 27,484</b> |
|               | 7,5  | 170,645 ± 5,575  | 171,367 ± 38,598      | 137,977 ± 31,184      | 159,059 ± 35,812        |
|               | 9    | 102,599 ± 3,423  | 93,388 ± 20,886       | 83,799 ± 20,122       | <b>61,127 ± 13,931</b>  |
|               | 12   | 125,426 ± 4,865  | 112,203 ± 25,173      | 83,807 ± 18,879       | <b>72,603 ± 16,321</b>  |
|               | 16   | 118,202 ± 14,806 | 102,664 ± 25,767      | 97,889 ± 21,947       | 100,066 ± 23,834        |
|               | 23,5 | 95,821 ± 2,237   | 71,036 ± 18,366       | 86,522 ± 25,325       | <b>47,442 ± 10,758</b>  |
| Threonine     | 1    | 2,218 ± 0,103    | 1,934 ± 0,458         | <b>0,751 ± 0,169</b>  | <b>0,465 ± 0,109</b>    |
|               | 4    | 3,010 ± 0,184    | 2,288 ± 0,514         | <b>1,154 ± 0,259</b>  | <b>0,727 ± 0,163</b>    |
|               | 7,5  | 3,077 ± 0,147    | 2,468 ± 0,571         | <b>0,957 ± 0,223</b>  | <b>1,175 ± 0,264</b>    |
|               | 9    | 3,669 ± 0,086    | 2,818 ± 0,636         | <b>1,012 ± 0,227</b>  | <b>1,128 ± 0,257</b>    |
|               | 12   | 2,665 ± 0,069    | 2,205 ± 0,496         | <b>0,980 ± 0,220</b>  | <b>0,969 ± 0,219</b>    |
|               | 16   | 2,018 ± 0,028    | 1,387 ± 0,312         | <b>0,727 ± 0,166</b>  | <b>0,576 ± 0,151</b>    |
|               | 23,5 | 1,791 ± 0,058    | <b>0,592 ± 0,134</b>  | <b>0,486 ± 0,113</b>  | <b>0,327 ± 0,074</b>    |
| Valine        | 1    | 0,305 ± 0,005    | 0,664 ± 0,155         | 0,467 ± 0,106         | 0,271 ± 0,076           |
|               | 4    | 0,436 ± 0,024    | <b>0,993 ± 0,223</b>  | 0,556 ± 0,125         | 0,508 ± 0,115           |
|               | 7,5  | 0,242 ± 0,016    | <b>0,567 ± 0,131</b>  | <b>0,579 ± 0,134</b>  | <b>0,727 ± 0,164</b>    |
|               | 9    | 0,293 ± 0,023    | 0,639 ± 0,145         | 0,587 ± 0,135         | 0,512 ± 0,127           |
|               | 12   | 0,176 ± 0,021    | 0,336 ± 0,076         | <b>0,408 ± 0,091</b>  | 0,408 ± 0,095           |
|               | 16   | 0,208 ± 0,020    | 0,408 ± 0,093         | 0,357 ± 0,080         | 0,355 ± 0,085           |
|               | 23,5 | 0,195 ± 0,006    | 0,249 ± 0,063         | 0,253 ± 0,058         | 0,241 ± 0,054           |
| Methionine    | 1    | 0,036 ± 0,005    | 0,044 ± 0,011         | 0,035 ± 0,008         | 0,034 ± 0,011           |
|               | 4    | 0,036 ± 0,005    | 0,044 ± 0,011         | 0,035 ± 0,008         | 0,034 ± 0,011           |
|               | 7,5  | 0,036 ± 0,005    | 0,044 ± 0,011         | 0,035 ± 0,008         | 0,034 ± 0,011           |
|               | 9    | 0,036 ± 0,005    | 0,044 ± 0,011         | 0,035 ± 0,008         | 0,034 ± 0,011           |
|               | 12   | 0,036 ± 0,005    | 0,044 ± 0,011         | 0,035 ± 0,008         | 0,034 ± 0,011           |
|               | 16   | 0,036 ± 0,005    | 0,044 ± 0,011         | 0,035 ± 0,008         | 0,034 ± 0,011           |
|               | 23,5 | 0,036 ± 0,005    | 0,044 ± 0,011         | 0,035 ± 0,008         | 0,034 ± 0,011           |
