# Supplementary material
Source: PubMed Central journal article supplement (PMC2832245)
Supplement: pp.109.151795_2.pdf [file pp.109.151795_2.pdf]

|               |      |                       |                        |                        |                        |
|---------------|------|-----------------------|------------------------|------------------------|------------------------|
| Methionine    | 1    | 0,055 ± 0,003         | <b>0,029 ± 0,010</b>   | 0,083 ± 0,022          | 0,075 ± 0,019          |
|               | 4    | 0,056 ± 0,002         | 0,043 ± 0,011          | 0,089 ± 0,021          | 0,055 ± 0,016          |
|               | 7,5  | 0,068 ± 0,001         | <b>0,033 ± 0,009</b>   | <b>0,034 ± 0,011</b>   | 0,053 ± 0,013          |
|               | 9    | 0,060 ± 0,004         | 0,060 ± 0,016          | 0,050 ± 0,012          | 0,041 ± 0,011          |
|               | 12   | 0,044 ± 0,007         | 0,048 ± 0,012          | 0,035 ± 0,011          | 0,053 ± 0,013          |
|               | 16   | 0,023 ± 0,006         | 0,052 ± 0,012          | 0,048 ± 0,012          | 0,036 ± 0,009          |
|               | 18   | 0,015 ± 0,003         | 0,033 ± 0,008          | 0,031 ± 0,009          | 0,017 ± 0,005          |
|               | 23,5 | <b>0,064 ± 0,008</b>  | <b>0,039 ± 0,011</b>   | <b>0,061 ± 0,015</b>   | <b>0,022 ± 0,006</b>   |
| Phenylalanine | 1    | 0,843 ± 0,025         | 0,871 ± 0,219          | <b>1,968 ± 0,453</b>   | 1,359 ± 0,312          |
|               | 4    | 0,538 ± 0,027         | 0,750 ± 0,173          | <b>2,691 ± 0,604</b>   | <b>1,425 ± 0,324</b>   |
|               | 7,5  | 0,701 ± 0,010         | 0,735 ± 0,176          | 1,341 ± 0,318          | 1,314 ± 0,314          |
|               | 9    | 0,769 ± 0,030         | 0,929 ± 0,209          | 0,948 ± 0,224          | 0,969 ± 0,225          |
|               | 12   | 0,647 ± 0,016         | 0,910 ± 0,229          | 0,904 ± 0,204          | 0,935 ± 0,220          |
|               | 16   | 0,550 ± 0,028         | 0,983 ± 0,221          | 0,765 ± 0,173          | 0,795 ± 0,186          |
|               | 18   | 0,307 ± 0,060         | 0,649 ± 0,155          | 0,530 ± 0,139          | 0,429 ± 0,116          |
|               | 23,5 | <b>1,054 ± 0,162</b>  | <b>1,105 ± 0,258</b>   | <b>1,800 ± 0,412</b>   | <b>1,432 ± 0,326</b>   |
| Pyruvate      | 1    | 0,067 ± 0,015         | <b>0,610 ± 0,137</b>   | <b>0,817 ± 0,185</b>   | <b>0,858 ± 0,197</b>   |
|               | 4    | 0,147 ± 0,001         | <b>0,520 ± 0,117</b>   | <b>2,232 ± 0,503</b>   | <b>0,905 ± 0,215</b>   |
|               | 7,5  | 0,096 ± 0,003         | <b>0,380 ± 0,086</b>   | <b>1,020 ± 0,229</b>   | <b>1,199 ± 0,269</b>   |
|               | 9    | 0,094 ± 0,014         | 0,176 ± 0,040          | <b>0,308 ± 0,070</b>   | <b>0,282 ± 0,063</b>   |
|               | 12   | 0,081 ± 0,006         | 0,200 ± 0,050          | 0,180 ± 0,041          | <b>0,203 ± 0,046</b>   |
|               | 16   | 0,073 ± 0,003         | 0,158 ± 0,036          | 0,136 ± 0,031          | 0,126 ± 0,030          |
|               | 18   | 0,028 ± 0,008         | 0,051 ± 0,012          | <b>0,103 ± 0,025</b>   | 0,052 ± 0,013          |
|               | 23,5 | <b>0,022 ± 0,006</b>  | <b>0,102 ± 0,024</b>   | <b>0,175 ± 0,041</b>   | <b>0,202 ± 0,046</b>   |
| Serine        | 1    | 4,595 ± 0,157         | 5,826 ± 1,419          | <b>11,356 ± 2,607</b>  | 7,854 ± 1,845          |
|               | 4    | 5,114 ± 0,259         | 4,765 ± 1,086          | 10,732 ± 2,408         | 9,530 ± 2,213          |
|               | 7,5  | 10,490 ± 0,116        | <b>5,978 ± 1,385</b>   | 8,393 ± 2,328          | 12,028 ± 2,779         |
|               | 9    | 7,893 ± 0,360         | 10,717 ± 2,403         | 11,379 ± 2,624         | 11,331 ± 2,549         |
|               | 12   | 6,912 ± 0,216         | 8,181 ± 2,049          | 8,896 ± 2,006          | 8,702 ± 2,189          |
|               | 16   | 4,506 ± 0,111         | 9,290 ± 2,081          | 6,345 ± 1,422          | 7,537 ± 1,719          |
|               | 18   | 2,361 ± 0,143         | <b>7,121 ± 1,680</b>   | 3,810 ± 0,908          | 3,076 ± 0,789          |
|               | 23,5 | <b>6,248 ± 1,008</b>  | <b>7,689 ± 1,809</b>   | <b>10,174 ± 2,309</b>  | <b>7,982 ± 1,796</b>   |
| Shikimate     | 1    | 0,247 ± 0,008         | 0,214 ± 0,050          | 0,188 ± 0,043          | 0,187 ± 0,042          |
|               | 4    | 0,300 ± 0,006         | 0,337 ± 0,078          | 0,245 ± 0,055          | 0,241 ± 0,057          |
|               | 7,5  | 0,327 ± 0,008         | 0,417 ± 0,093          | 0,281 ± 0,063          | 0,314 ± 0,070          |
|               | 9    | 0,416 ± 0,008         | 0,441 ± 0,099          | 0,399 ± 0,090          | 0,379 ± 0,086          |
|               | 12   | 0,357 ± 0,012         | 0,386 ± 0,097          | 0,338 ± 0,076          | 0,354 ± 0,080          |
|               | 16   | 0,428 ± 0,009         | 0,351 ± 0,079          | 0,327 ± 0,074          | 0,289 ± 0,065          |
|               | 18   | 0,295 ± 0,032         | 0,245 ± 0,058          | 0,264 ± 0,062          | <b>0,163 ± 0,041</b>   |
|               | 23,5 | <b>0,230 ± 0,011</b>  | <b>0,186 ± 0,042</b>   | <b>0,179 ± 0,041</b>   | <b>0,173 ± 0,039</b>   |
| Succinate     | 1    | 0,125 ± 0,012         | 0,118 ± 0,027          | 0,121 ± 0,028          | 0,101 ± 0,023          |
|               | 4    | 0,077 ± 0,011         | 0,098 ± 0,023          | 0,153 ± 0,034          | 0,159 ± 0,036          |
|               | 7,5  | 0,128 ± 0,002         | 0,098 ± 0,022          | 0,171 ± 0,040          | 0,191 ± 0,043          |
|               | 9    | 0,312 ± 0,033         | 0,275 ± 0,062          | 0,216 ± 0,049          | 0,271 ± 0,064          |
|               | 12   | 0,332 ± 0,022         | 0,342 ± 0,086          | <b>0,148 ± 0,034</b>   | <b>0,146 ± 0,033</b>   |
|               | 16   | 0,272 ± 0,011         | 0,326 ± 0,073          | <b>0,160 ± 0,037</b>   | <b>0,170 ± 0,039</b>   |
|               | 18   | 0,190 ± 0,012         | 0,210 ± 0,052          | <b>0,091 ± 0,023</b>   | <b>0,099 ± 0,023</b>   |
|               | 23,5 | <b>0,226 ± 0,039</b>  | <b>0,088 ± 0,021</b>   | <b>0,075 ± 0,019</b>   | <b>0,062 ± 0,014</b>   |
| Sucrose       | 1    | 96,611 ± 1,803        | 96,438 ± 21,926        | 90,347 ± 20,712        | 74,042 ± 17,026        |
|               | 4    | 68,529 ± 0,944        | 68,565 ± 15,405        | 97,574 ± 21,983        | 78,891 ± 20,173        |
|               | 7,5  | 121,349 ± 1,484       | 99,256 ± 22,335        | 87,558 ± 19,724        | 105,977 ± 23,714       |
|               | 9    | 126,297 ± 3,307       | <b>65,490 ± 14,724</b> | <b>42,158 ± 9,490</b>  | <b>37,657 ± 8,426</b>  |
|               | 12   | 91,185 ± 1,642        | 63,557 ± 16,031        | <b>42,174 ± 9,761</b>  | <b>50,977 ± 11,883</b> |
|               | 16   | 81,339 ± 4,033        | 106,788 ± 23,886       | 91,078 ± 21,094        | 72,739 ± 16,418        |
|               | 18   | 45,930 ± 6,684        | 85,906 ± 20,919        | 50,688 ± 12,233        | 40,629 ± 10,292        |
|               | 23,5 | <b>83,810 ± 3,905</b> | <b>64,123 ± 14,682</b> | <b>49,577 ± 11,251</b> | <b>42,265 ± 9,479</b>  |
| Threonine     | 1    | 3,082 ± 0,101         | <b>1,353 ± 0,310</b>   | <b>1,577 ± 0,360</b>   | <b>1,129 ± 0,255</b>   |
|               | 4    | 2,988 ± 0,074         | <b>1,886 ± 0,428</b>   | <b>1,820 ± 0,409</b>   | <b>1,197 ± 0,275</b>   |
|               | 7,5  | 3,411 ± 0,035         | <b>1,710 ± 0,384</b>   | <b>0,914 ± 0,220</b>   | <b>1,147 ± 0,260</b>   |
|               | 9    | 3,750 ± 0,139         | <b>2,123 ± 0,477</b>   | <b>0,625 ± 0,142</b>   | <b>0,615 ± 0,138</b>   |
|               | 12   | 3,592 ± 0,143         | <b>1,952 ± 0,489</b>   | <b>0,683 ± 0,154</b>   | <b>0,739 ± 0,172</b>   |
|               | 16   | 2,317 ± 0,209         | 2,594 ± 0,612          | <b>0,402 ± 0,096</b>   | <b>0,682 ± 0,155</b>   |
|               | 18   | 3,171 ± 0,456         | <b>1,752 ± 0,401</b>   | <b>1,710 ± 0,386</b>   | <b>1,221 ± 0,275</b>   |
|               | 23,5 |                       |                        |                        |                        |
| Valine        | 1    | 0,314 ± 0,008         | 0,607 ± 0,151          | <b>1,578 ± 0,358</b>   | <b>1,162 ± 0,263</b>   |
|               | 4    | 0,244 ± 0,023         | 0,452 ± 0,102          | <b>2,317 ± 0,521</b>   | <b>1,100 ± 0,266</b>   |
|               | 7,5  | 0,267 ± 0,011         | 0,446 ± 0,109          | <b>1,085 ± 0,288</b>   | <b>1,039 ± 0,276</b>   |
|               | 9    | 0,372 ± 0,007         | 0,615 ± 0,138          | 0,677 ± 0,152          | 0,708 ± 0,160          |
|               | 12   | 0,257 ± 0,001         | 0,611 ± 0,157          | <b>0,650 ± 0,146</b>   | <b>0,692 ± 0,170</b>   |
|               | 16   | 0,191 ± 0,008         | <b>0,673 ± 0,151</b>   | <b>0,556 ± 0,125</b>   | <b>0,604 ± 0,138</b>   |
|               | 18   | 0,135 ± 0,016         | <b>0,375 ± 0,090</b>   | <b>0,372 ± 0,088</b>   | 0,291 ± 0,074          |
|               | 23,5 | <b>0,405 ± 0,068</b>  | 0,770 ± 0,176          | <b>1,679 ± 0,377</b>   | <b>1,335 ± 0,300</b>   |
